# Supplementary material for: Status of and Perspectives on River Restoration in Europe: 310&nbsp;000 EUR per Hectare of Restored River
Source: Preprints.org preprint supplement (doi:10.20944/preprints201712.0033.v1), 2017-12-06
Supplement: Supplementary file 1 [file supplementary]

## Sheet: Arkusz1
Lp	Country	River	Approximate width of the river [m]	Year	Entity	Scope of the project	Declared length of the river/valley restored	Assummed length of the river/valley restored used in calculations	Area [ha]	EUR/ha	kEUR/ha	Solution	Amount of the project (kEUR)	Source of Founding	% EU funding	Local community participation	Monitoring	Larger restoration plan
1	Austria	River Traisen?	10	2017	other : Verbund/VHP energy provider	works within floodplain	river reach lenght > 2 km, more than one watercourse	10	10	25000	25	a, c, d, f, h, new river bed	250	EU founding, government budget, assosiations or foundation founds, private funds	16	yes	yes	yes
2	Austria	Mur River	200	2016	nationwide authorities, provincial/regional authorities,	works within channel, works within floodplain	river reach lenght > 2 km	5	100	28000	28	c, d, e, g, h, Development of new riverine forests, creation/Improvement of riverine forest pools	2800	EU founding, government budget,	50	yes	yes	no
3	Austria	Enns River	50	2015	nationwide authorities, provincial/regional authorities	works within channel, works within floodplain	river reach lenght > 2 km, more than one watercourse	10	50	58000	58	c, d, e, g, h, Development of new riverine forests, creation/Improvement of riverine forest pools	2900	EU founding, government budget	50	yes	yes	no
4	Austria	Morava river	50	2017	national park	works within channel, works within floodplain	river reach lenght < 2 km	1	5	700000	700	Dyke relocation, Increase water retention area, Creation of groynes, Creation of deflectors , Re-connection of river channels, Introducing sinuosity, Meanders reopened	3500	EU funding, government budget	50		yes	no
5	Austria	Mur River	25	2007	nationwide authorities, provincial/regional authorities,	works within channel, works within floodplain	river reach lenght > 2 km	5	12.5	176000	176	c, d, e, g, h, Development of new riverine forests, creation/Improvement of riverine forest pools	2200	EU founding, government budget,	50	yes	yes	no
6	Austria	Danube River	500	2011	: Federal Ministry of Transport, Innovation and Technology, Austria; viadonau – Austrian Waterways-Agency Lim., Vienna; Nationalpark Donau-Auen GmbH	works within channel, works within floodplain	river reach lenght > 2 km	5	250	800	0.8	a) total survey of aquatic macrophytes as the basis for environmental-friendly technical solutions aimed at minimising river bed incision	200	government budget	-	no	yes	yes
7	Austria	Danube River	200	1998	WWF Austria, Austrian Ministry of Economy	works within channel, works within floodplain	river reach lenght < 2 km	1	20	3750	3.75	Lowering of embankments, Re-connection to wider floodplain, Re-instatement of old course	75		-	u	u	u
8	Belgium	Bocq river	10	2014	provincial/regional authorities,	works within channel, works within floodplain, works within catchment	more than one watercourse	10	10	286200	286.2		2862	EU funding, government budget	32	yes	yes	yes
9	Belgium	Dijle river	22	2001	association (NGO)	works within channel, works within floodplain	river reach lenght > 2 km	5	11	76818.2	76.8182		845	EU funding, association	50	yes	yes	yes
10	Belgium	Sûre River	10	2011	provincial/regional authorities	works within channel	more than one watercourse	10	10	20000	20	a, b, e, f, g,	200	EU founding, government budget,	50	yes	yes	yes
11	Belgium	La Geer at Waremme	5	2012	association (NGO)	works within channel, works within floodplain	river reach lenght > 2 km	5	2.5	112000	112	d, e, j: The river has been put into the old channel (during the 50ies the river has been modified to be straight). The works have been done on a ground which proprety of a public body thanks to an Interreg project named Aquadra.	280	EU founding, government budget	50	yes	no	no
12	Belgium	Vlaams Gewest	10	2016	association (NGO)	works within catchment	valley	2	200	21845	21.845		4369	EU funding, association	50	yes	yes	yes
13	Belgium & Luxembourg	Basins of the Sûre, the Ourthe and the Our in Belgium and in Luxembourg	50	2011	Park Reserve	works within channel, works within floodplain, works within catchment	more than one watercourse	10	50	77840	77.84		3892	EU funding, government budget	50	yes	yes	yes
14	Croatia	Drava River	200	2020	nationwide authorities, provincial/regional authorities, association (NGO)	works within channel, works within floodplain	river reach lenght > 2 km	5	100	46900	46.9	a, h	4690	EU founding, government budget, assosiations or foundation founds	60	yes	yes	yes
15	Croatia	River Vuka	10	2013	nationwide authorities	works within floodplain	river reach lenght > 2 km	5	5	200000	200	e, f, h,	1000	EU founding, government budget	85	yes	yes	no
16	Denmark	Skjern River	50	2004	nationwide authorities	works within floodpain	river reach lenght > 2 km	5	25	294280	294.28	Re-meandering of channel to increase nutrient capacity and improve physiscal condictions, Creation of wetlands, Re-meandering of channel to increase nutrient capacity and improve physiscal condictions	7357	EU funding, government budget	30	yes	yes	yes
17	Denmark	Odense River	75	1994	provincial/regional authorities,	works within floodplain	river reach lenght < 2 km	1	7.5	94800	94.8	riffle	711	government budget	-	no	yes	no
18	Denmark	Stora River	50	1989	provincial/regional authorities,	works within floodplain	river reach lenght < 2 km	1	5	28800	28.8	stone riffle	144	government budget	-	no	yes	no
19	Denmark	Aarhus River	30	2004	provincial/regional authorities,	works within channel, works within floodplain,	river reach lenght < 2 km	1	3	52000	52	riffle	156	government budget	-	no	no	no
20	Denmark	Gudena River	30	2003	provincial/regional authorities,	works within channel, works within floodplain,	river reach lenght < 2 km	1	3	518667	518.667	riffle	1556	government budget	-	no	no	no
21	Denmark	Odense River	15	2002	provincial/regional authorities,	works within floodplain	river reach lenght < 2 km	1	1.5	244667	244.667	riffle	367	government budget	-	no	no	yes
22	Denmark	Tryggevaelde	4	2006	provincial/regional authorities,	works within channel, works within floodplain,	river reach lenght > 2 km	5	2	55500	55.5	re-meandring	111	government budget	-	no	no	no
23	Estonia	Pirita	30	2013	nationwide authorities	works within channel	river reach length < 2 km (project involved 2 fish passes and 2 habitat improvement sites)	1	3	133333	133.333	f, g, j: At the habitat improvement sites gravel and boulders were added to the riverbed. Bedrock cutting was done at one site.	400	EU founding, government budget	85	yes	yes	yes
24	Finland	Pajakkajoki	100	2016	provincial/regional authorities	works within channel	river reach lenght < 2 km	1	10	17500	17.5	d, f, h, j: remval of log floating structures	175	government budget	-	yes	no	no
25	Finland	Vääräjoki	100	2017	provincial/regional authorities	works within channel	river reach lenght > 2 km	5	50	3740	3.74	d, f, h	187	government budget	-	yes	no	no
26	Finland	Vaarajoki	60	2007	provincial/regional authorities,	works within channel	river reach lenght > 2 km	5	30	10000	10	f, h	300	government budget	-	yes	yes	no
27	Finland	Longinoja brook	5	2011	provincial/regional authorities, nationwide authorities	works within channel		1	0.5	20000	20	Introducing sinuosity, Introducting large woody debris, Building fishways, Building of submerged weirs and pits, Adding sinuosity, Introducing gravel	10	government budget	-	yes	no	no
28	France	Cousin river	12	2017	National Park	works within channel, works within catchment	the whole river	10	12	83333.3	83.3333	a, b, d, g, j: wood bridges / Fence and drinking troughs for cattle	1000	EU founding, government budget,	50	yes	yes	no
29	France	Alagnon	10	2008	provincial/regional authorities,	works within channel	river reach lenght < 2 km	5	5	40000	40	a, suppression of barrage (heigh 3m)	200	government budget, association funds	-	yes	yes	yes
30	France	Loire River	400	2005		works within channel	more than one watercourse	10	400	4000	4		1600	government budget	-	u	yes	yes
31	France	Vienne River	140	1999		works within channel, works within floodplain	river reach lenght > 2 km	5	70	37142.9	37.1429		2600	government budget	-	u	yes	yes
32	France	Moselle River	100	2011		works within channel	river reach lenght < 2 km	1	10	25500	25.5		255	government budget	-	u	yes	no
33	France	Rhône River	55	2011		works within channel, works within floodplain	river reach lenght < 2 km	1	5.5	114364	114.364		629	government budget	-	u	yes	yes
34	France	Baume River (onema)	50	2007		works within channel	river reach lenght < 2 km	1	5	41000	41		205	EU founding, government budget	-	u	yes	no
35	France	Adour River	50	2018		works within channel, works within floodplain	river reach lenght > 2 km	5	25	149312	149.312		3732.8	government budget	-	u	yes	yes
36	France	Allier River (Onema)	25	1998		works within channel	river reach lenght < 2 km	1	2.5	506120	506.12		1265.3	government budget	-	u	yes	no
37	France	Toques River	20	2017		works within channel	more than one watercourse	10	20	185000	185		3700	EU founding, government budget, associations funds	-	u	yes	yes
38	France	Leguer River	13	2001		works within channel	2 km	2	2.6	538462	538.462		1400	EU founding, government budget	-	u	no	no
39	France	La Vezouze River	12	2007		works within channel, works within floodplain	river reach lenght < 2 km	1	1.2	1.60833e+06	1608.33		1930	government budget	-	u	yes	yes
40	France	Clauge River	10	2008		works within channel	river reach lenght > 2 km	5	5	20000	20		100	EU founding, government budget	-	u	no	no
41	France	Couasnon River	6	2009		works within channel	river reach lenght > 2 km	5	3	69040	69.04		207.12	government budget	-	u	no	no
42	France	Doquette River	4.5	2008		works within channel	river reach lenght < 2 km	1	0.45	20000	20		9	government budget	-	u	yes	no
43	France	Colostre River	2	2001		works within channel	river reach lenght > 2 km	5	1	65800	65.8		65.8	government budget, associations funds	-	u	no	no
44	France	Redon River	2	2007		works within channel	river reach lenght < 2 km	1	0.2	728500	728.5		145.7	government budget, other	-	u	yes	no
45	France	La Fontenelle River	2	2011		works within channel, works within floodplain	river reach lenght < 2 km	1	0.2	1525000	1525		305	EU founding, government budget	-	u	yes	yes
46	France	River Bièvre	2	2003		works within channel, works within catchment	river reach lenght < 2 km	1	0.2	2600000	2600		520	government budget	-	u	yes	no
47	France	Petersbach (Onema)	2	2007		works within channel	river reach lenght < 2 km	1	0.2	5680000	5680		1136	EU founding, government budget	-	u	yes	yes
48	Germany	Rhine, Murg	270	2015	provincial/regional authorities, association (NGO)	works within channel, works within floodplain	more than one watercourse	10	270	55555.6	55.5556	a, b, d, f, h,	15000	EU founding, government budget, association funds	50	yes	yes	no
49	Germany	Ruhr	60	2011	provincial/regional authorities,	works within channel, works within floodplain	river reach lenght > 2 km	5	30	8333.33	8.33333	a, d, h	250	government budget, association funds	-	yes	yes	no
50	Hungary	River Pécs	55	2015	provincial/regional authorities	works within channel	the whole river	20	110	1363.64	1.36364	e, building of regulating reservoirs (3 pcs)	150	EU founding, government budget	0	no	yes	no
51	Hungary	Drava, branch of Boros Drava, branch of Drávakeresztúr	220	2010	provincial/regional authorities	works within channel	river reach lenght < 2 km	1	22	5454.55	5.45455	e, f	120	EU founding, government budget	85	no	yes	no
52	Hungary	River Dravab- Baranya county	220	2015	provincial/regional authorities	works within channel	river reach lenght > 2 km	5	110	1363.64	1.36364	Removal of the wood remains endangering the shipping on the Drava River, Extracting of tree remains from the waterway by dredger, transporting to the coast by a barge for cutting and drying. The demolition of the not-used stone works in the waterway, (piling by a dredger into a barge) and building them into the coastal protection works.	150	EU founding, government budget	85	no	yes	no
53	Hungary	Branch of Drávakeresztúr – Baranya county	220	2015	provincial/regional authorities	works within channel	the whole river	20	440	409.091	0.409091	Removal trees, bushes and sediment - revitalization of Drávakeresztúri branch	180	EU founding, government budget	85	no	yes	no
54	Hungary	Drava	200	2013	provincial/regional authorities	works within floodplain/oxbows	the whole river	20	400	535	0.535	restoration of an oxbow lake that has been dried out and caused detoriating effects on the water quality and the environment in a general sence.	214	EU founding, government budget	85	yes	yes	no
55	Hungary	Drava	100	2012	provincial/regional authorities	works within channel	the whole river	20	200	750	0.75	The Water Framework Directive of the EU compulsory prescribes the condition’s valuation of the water bodies, rivers regularly in every 6 years in order to place the waters in a good state. A basic part of this is the examination of the water’s morphological features. The project aims this work to help the condition’s valuation. Trough completing the task there will be measurements of water discha…	150	EU founding, government budget	85	no	yes	no
56	Hungary	Drava	100	2006	provincial/regional authorities	works within channel	river reach lenght < 2 km	1	10	20000	20	removal of the logs and ooden elements out of the River Drava to the safe river transport and demotilation of the regulation structures	200	EU founding, government budget	85	no	yes	no
57	Hungary	Drava River	40	2012	National Park Directorate	works within floodplain	river reach lenght > 2 km	5	20	60000	60	a, dredging	1200	EU founding, government budget,	85	no	yes	no
58	Hungary	Krizsnica oxbow – Baranya county	20	2012	provincial/regional authorities	works within catchment/oxbow	the whole river/oxbow	10	20	6950	6.95	technological study for Korcsina around Markóc- Specific proposals to the technologic execution of inundation of the death channel, the downstream rehabilitation of the Korcsina Canal	139	EU founding, government budget	85	yes	yes	no
59	Hungary	river branch of Felsőszentmárton at Drava	220	2012	provincial/regional authorities	works within channel	river reach lenght > 2 km	5	110	6090.91	6.09091	e, stopping the degradation, to ensure the side branch of the continuous replenishment of water a minimum of 200 days a year, To ensure the side branch of the daily water exchange; - To restore the "river-type" environment of flora and fauna; - Ensure the possibility of spawning fish;	670	government budget	-	no	yes	no
60	Hungary	Drávaszabolcs-Kémes flood basin – Baranya county	220	2013	nationwide authorities, provincial/regional authorities	works within catchment/flood basin	the whole river	20	440	20454.5	20.4545	development of the dike, building hydrotechnical structures	9000	government budget	-	yes	yes	yes
61	Hungary	Drava and Mura	30	2011	nationwide authorities, provincial/regional authorities	works within channel	river reach lenght < 2 km	1	3	716667	716.667	building regulation structures at river mounth River Drava and Mura	2150	government budget	-	no	yes	no
62	Hungary	Rinya	15	2012	provincial/regional authorities	works within channel	the whole river	20	30	65000	65	a, b, c, d, g, other: whole reconstraction of the river	1950	government budget	-	no	yes	no
63	Hungary	River of Karasica - Vasas-belvárdi	10	2012	provincial/regional authorities	works within channel	river reach lenght > 2 km	5	5	310000	310	b, sediment dredging, river regulation, regulation of erosion, develop the regulated river bed	1550	government budget	-	no	yes	no
64	Hungary	River Kapos	7	2012	provincial/regional authorities	works within channel	the whole river	20	14	14285.7	14.2857	building of retarding reservoir	200	government budget	-	no	yes	no
65	Hungary	River Kapos	7	2014	provincial/regional authorities	works within channel	the whole river	20	14	14285.7	14.2857	a, d, regulation of river	200	government budget	-	no	yes	no
66	Hungary	More than 17 catchment and more than 10 cannals - Hungary Baranya county	5	2012	provincial/regional authorities	works within catchment	more than one watercourse	10	5	80000	80	demning of the area next to the River	400	government budget	-	no	yes	no
67	Italy	Mareiter Bach – Rio Mareta	50	2010	provincial/regional authorities	works within channel, works within floodplain	river reach lenght < 2 km	1	5	580000	580	a,c	2900	EU founding, government budget	50	yes	yes	no
68	Italy	Ahr - Rio Aurino	90	2015	provincial/regional authorities	works within channel, works within floodplain	river reach lenght > 2 km	5	45	26666.7	26.6667	a,c	1200	government budget	-	yes	yes	no
69	Italy	Rovegio	55	2014	Consorzio di Bonifica Acque Risorgive (Land Reclamation Consortium Acque Risorgive)	works within channel	river reach lenght < 2 km	1	5.5	445455	445.455	f, h, i, j: intoducing of trees	2450	government budget	-	no	no	yes
70	Italy	Comunetto	55	2016	Consorzio di Bonifica Acque Risorgive (Land Reclamation Consortium Acque Risorgive)	works within floodplain	river reach lenght < 2 km	1	5.5	572727	572.727	f, h, i, j: intoducing of trees	3150	government budget	-	no	no	yes
71	Italy	Collettore di FAVARO / Fossa PAGANA	55	2005	Consorzio di Bonifica Acque Risorgive (Land Reclamation Consortium Acque Risorgive)	works within channel	river reach lenght > 2 km	5	27.5	169091	169.091	a, c, f, h, i, j: introducing of trees	4650	government budget	-	no	no	yes
72	Italy	Zero	23	2003	Consorzio di Bonifica Acque Risorgive (Land Reclamation Consortium Acque Risorgive)	works within chnnel	river reach lenght > 2 km	5	11.5	669565	669.565	h, i, j : intorducing of trees	7700	government budget	-	no	yes	yes
73	Italy	Comuna	14	2009	Consorzio di Bonifica Acque Risorgive (Land Reclamation Consortium Acque Risorgive)	works within channel, works within floodplain	river reach lenght > 2 km	5	7	628571	628.571	h, i, j : intorducing of trees	4400	government budget	-	no	yes	yes
74	Italy	DRAGANZIOLO	10	2009	Consorzio di Bonifica Acque Risorgive (Land Reclamation Consortium Acque Risorgive)	works within floodplain	river reach lenght < 2 km	1	1	850000	850	g, h, i, j: intorducing of trees	850	government budget	-	no	no	yes
75	Italy	DRAGANZIOLO	10	2005	Consorzio di Bonifica Acque Risorgive (Land Reclamation Consortium Acque Risorgive)	works within floodplain	river reach lenght < 2 km	1	1	2000000	2000	h, i	2000	government budget	-	yes	yes	yes
76	Italy	Pionca	9	2011	Consorzio di Bonifica Acque Risorgive (Land Reclamation Consortium Acque Risorgive)	works within channel, works within floodplain	river reach lenght > 2 km	5	4.5	1.46667e+06	1466.67	f, h, i, j: intoducing of trees	6600	government budget	-	no	no	yes
77	Italy	MARZENEGO	6	2003	Consorzio di Bonifica Acque Risorgive (Land Reclamation Consortium Acque Risorgive)	works within floodplain	river reach lenght < 2 km	1	0.6	4500000	4500	d, f, h, i	2700	government budget	-	no	yes	yes
78	Italy	DESOLINO – Rio SAN MARTINO – Rio SANT’AMBROGIO	5	2008	Consorzio di Bonifica Acque Risorgive (Land Reclamation Consortium Acque Risorgive)	works within channel, works within floodplain	river reach lenght > 2 km, more than one watercourse	10	5	880000	880	c, f, h, i, j: introducing of trees	4400	government budget	-	no	yes	yes
79	Netherlands	Ijssel	50	1989	nationwide authorities	works within floodplain	river reach lenght > 2 km	5	25	10000	10	lowering the floodplain and digging side channels to enlarge discharge capacity of the river and for nature development. And introducing cattle and horses to manage vegetation development. Too much woody vegetation decreases the flow capacity of the floodplain. Cattle and horses can depress development of shrubs and trees.	250	government budget,	-	no	yes	yes
80	Netherlands	Waal	40	1996	nationwide authorities	works within floodplain	river reach lenght > 2 km	5	20	12500	12.5	a, lowering the floodplain and digging side channels to enlarge discharge capacity of the river and for nature development. And introducing cattle and horses to manage vegetation development. Too much woody vegetation decreases the flow capacity of the floodplain. Cattle and horses can depress development of shrubs and trees.	250	EU founding, government budget,	-	yes	yes	yes
81	Poland	Narew	20	2009	association (NGO), National Park	works within floodplain	river reach lenght > 2 km	5	10	31300	31.3	e, wykaszanie łąk łegowych, odkrzaczanie łąk i pastwisk, rolnictwo ekologiczne, edukacja ekologiczna	313	EU founding, government budget, association funds	0	yes	no	yes
82	Poland	Sokołówka	10	2016	provincial/regional authorities,	works within channel, works within floodplain	the whole river	20	20	169425	169.425	e,f, j: budowa zbiorników wodnych, retencja wód opadowych, rewitalizacja nadrzecznych terenów zieleni miejskiej	3388.5	EU founding, government budget	65	yes	no	yes
83	Poland	Kwacza	5	2009	Park Krajobrazowy	works within channel, works within floodplain	river reach lenght > 2 km	5	2.5	157800	157.8	b, d, e, j: gniazdowa przecinka nadrzecznych drzew, 23 sztuczne wyspy kamienne, zatoczki i miejsca ze stagnującą wodą, połączenie koryta rzeki ze starorzeczem	394.5	EU founding, government budget	70	no	yes	yes
84	Poland	Biała Tarnowska	25	2014	provincial/regional authorities,	works within channel, works within floodplain	the whole river	20	50	96660	96.66	a, g, delimitation of erodible river corridor, improving continuity of riparian forests, elimination of invasive plant species, restoring continuity of bivalve population	4833	EU founding, government budget	85	no	yes	no
85	Poland	Ełk River	15	2020	National Park	works within channel	river reach lenght > 2 km	5	7.5	33333.3	33.3333	e, przekierowanie wód Kan. Rudzkiego w stare koryto rz. Ełk za pomocą budowli hydrotechnicznych	250	EU funding, NFOŚ,	85	yes	yes	no
86	Poland	Raba	25	2016	association (NGO)	works within channel, works within floodplain, works within catchment	more than one watercourse	10	25	44800	44.8	a, b, e, f, i,	1120	other	-	yes	yes	no
87	Poland	Jegrznia River	10	2016	National Park	works within channel	more than one watercourse	10	10	360000	360	c, e	3600	EU funding, NFOŚ, association or fundation funds	-	yes	yes	no
88	Republic of Irleand	Mulkear river	14	2015	nationwide authorities	works within channel, works within floodplain, works within catchment	river reach lenght < 2 km, more than one watercourse	10	14	124286	124.286	a, b, f, i,	1740	EU founding, government budget	50	no	yes	yes
89	Romania	Danube River	500	2013	association (NGO)	works within floodplain	river reach lenght > 2 km	5	250	4800	4.8	d, h	1200	EU founding, government budget, assosiations or foundation founds	75	yes	yes	no
90	Romania	Danube River	500	2016	provincial/regional authorities,	works within channel, works within floodplain	river reach lenght < 2 km	1	50	40000	40	a. f	2000	EU founding, government budget,	-	yes	yes	yes
91	Scotland	Ythan River	150	2005	local authority	works within channel, works within floodplain	more than one watercourse	10	150	4913.33	4.91333		737	EU funding, government budget	48	yes	yes	yes
92	Scotland	Pearls in Peril LIFE+ GB Project - Mingary Burn	6	2016	Scottish Natural Heritage and other	works within channel, works within floodplain	more than one watercourse	10	6	769500	769.5	woody debris, plantig trees	4617	EU funding, government budget	50	yes	yes	yes
93	Scotland	River Spey	40	2012	SEPA, National Park	works within channel, works within floodplain	river reach lenght < 2 km	1	4	7500	7.5	Removal of 900m3 of embankment material. Removal of in stream boulders and replacement with wood structures. Additional strategic wood structures introduced. Graded extracted gravel to be used for sediment reintroduction, Removal of 3 culvert pipes. Infilling of a large drainage ditch.	30	government budget	-	no	no	no
94	Scotland	The River South Esk - Rottal Burn	25	2012	Combination of charitable funds and Government funds	works within channel, works within floodplain, works within catchment	river reach lenght < 2 km	1	2.5	80000	80	work included channel realighnment, deflectors, use of woody debris, construtcion of a 2-stage channel	200	Combination of charitable funds and Government funds	-	yes	yes	yes
95	Scotland	River Findhorn	25	2015	provincial/regional authorities	works within channel, works within floodplain	river reach lenght > 2 km	5	12.5	20000	20	EXCAVATION OF ACCRETED SEDIMENTS (120,000cu.m approx)	250	government budget	-	no	yes	no
96	Scotland	The River South Esk - Pow Burn	20	2017	Combination of charitable funds and Government funds	works within channel, works within floodplain, works within catchment	river reach lenght > 2 km	5	10	35000	35	work included channel realighnment, deflectors, use of woody debris, construtcion of a 2-stage channel	350	Combination of charitable funds and Government funds	-	yes	yes	yes
97	Scotland	Eddleston water	6	2013	Tweed Forum, with the Scottish Environment Protection Agency (SEPA), the Scottish Government and University of Dundee	works within channel, works within floodplain	river reach lenght > 2 km	5	3	25000	25	meandering channel, Introducing large woody debris, creation of a new floodplain parallel to the river, embankment renaturalization	75	government budget	-	yes	yes	u
98	Scotland	Allan Water	2	2014	The Conservation Volunteers and the Centre for River Ecosystem Science	works within channel, works within floodplain	river reach lenght > 2 km	5	1	639	0.639	Creation of wet woodland, orchard	0.639	associations or fundation funds, private funds	-	yes	yes	no
99	Scotland	Burn of Mosset	2	2010	provincial/regional authorities,	works within floodpain	river reach lenght < 2 km	1	0.2	150000	150	sediment control and creation of wet woodland habitat by realigning channel so that it was no longer perched above the adjacent flood plain, as part of a flood defences scheme. These works were within the boundary of the temporary water storage area allowed to form during a flood event	30	government budget	-	no	yes	no
100	Scotland	Braid Burn	2	2012	AECOM, SEPA	works within channel, works within floodplain	river reach lenght < 2 km	1	0.2	200000	200	re-meandrig,	40	government budget	-	u	yes	yes
101	Scotland	The Inchewan Burn	2	2007	SEPA, Perth Council, SNH	works within channel, works within floodplain	river reach lenght < 2 km	1	0.2	500000	500	emoval of artificial wire/stone bed. Replicated upstream boulder bed step/pool sequence, Timber extraction of non-native conifer plantation. Planting of native broadleaf tree species, In-channel placement of boulders to provide flow diversity	100	government budget	-	yes	yes	yes
102	Scotland	Burn of Mosset	2	2008	Royal HaskoningDHV	works within channel, works within floodplain	river reach lenght > 2 km	5	1	116000	116	Create breaches in the bank, Floodplain reconnection, Riparian tree planting	116		-	u	u	u
103	Slovenia	Mura River	20	2011	other	works within channel, works within floodplain,	river reach lenght > 2 km	5	10	197500	197.5	natural erosion embankments, connection between river channel and former side branches, expansion of river bed on some parts of the river, new gravel bars	1975	EU funding, government budget	50	yes	yes	no
104	Spain	Ter River	25	2013	Consortium (Consorci del Ter)	works within channel	river reach lenght > 2 km	5	12.5	64000	64	other	800	EU founding, government budget	50	yes	yes	no
105	Sweden	Vindel River	300	2015	Umea University	works within catchment	more than one watercourse	10	300	8000	8	a, d, f,	2400	EU founding, government budget, association funds	50	yes	yes	yes
106	Sweden	ReBorn LIFE	90	2021	provincial/regional authorities,	works within catchment	more than one watercourse	10	90	137778	137.778	a, d, f, g	12400	EU founding, government budget	50	yes	yes	yes
107	Sweden		55	2016	provincial/regional authorities,	works within channel	more than one watercourse	10	55	9090.91	9.09091	a,	500	EU founding, government budget, private funds	50	yes	yes	yes
108	Sweden	Remibar	55	2016	nationwide authorities, provincial/regional authorities, privet investors	works within channel	more than one watercourse	10	55	14545.5	14.5455	a	800	EU founding, government budget	50	yes	yes	yes
109	Sweden	Fylean and Klingavalsan in Kavlingean catchment	20	2016	provincial/regional authorities,	works within channel, works within floodplain	more than one watercourse	10	20	12500	12.5	e,f,h, remeandring of parts of the stream	250	EU founding, government budget	50	no	yes	no
110	Sweden	Triple Lakes	15	2019	provincial/regional authorities,	works within channel and within lakes	more than one watercourse	10	15	266667	266.667	a, d, f, g	4000	EU founding, government budget, private funds	50	yes	yes	yes
111	Sweden	Segea	55	2017	provincial/regional authorities, Segea waterboard	works within catchment	more than one watercourse	10	55	3272.73	3.27273	e, f, h	180	government budget	-	yes	no	no
112	Sweden	Karlingean	55	2016	provincial/regional authorities, Karlingean waterboard	works within catchment	more than one watercourse	10	55	4545.45	4.54545	e, f, h, creating wetlands	250	government budget, other	-	yes	yes	no
113	Sweden	Vramsan/Helgea	50	2016	provincial/regional authorities,	works within catchment	the whole river	20	100	2500	2.5	a, e, f, h, creating wetlands	250	government budget	-	no	no	no
114	Sweden	Tullstorpsan	10	2016	association (NGO)	works within catchment	the whole river	20	20	12500	12.5	e, f, remeandring	250	government budget, association funds, other	-	yes	yes	no
115	Sweden	Hoje a	6	2016	provincial/regional authorities, other: Hoje a waterboard	works within catchment	the whole river	20	12	20833.3	20.8333	e,f, h, creating wetlands	250	government budget, other	-	yes	yes	no
116	UK	The river Ravensbourne (Lewisham section),	2.5	2008	London borough of Lewisham – Local Authority (regional!)	works within chnnel, addressed also the immediate floodplain	river reach lenght < 2 km	1	0.25	1368000	1368	a, b, e, h,	342	EU funding, government budget	48	yes	yes	yes
117	UK	Ballinderry River	10	2016	association (NGO)	works within channel, works within floodplain	river reach lenght > 2 km, more than one watercourse	10	10	34200	34.2	d, e, j: rock amouring of banks, Stock-proof fencing, Education and awerness raising	342	government budget, association or foundation funds, other	-	yes	yes	no
118	UK	Welland	4	2011	nationwide authorities, association funds	works within channel, works within floodplain,	river reach lenght < 2 km	1	0.4	175000	175	Creation of deflectors, Bank stabilisation, Introducing gravel, cattle drinkers, Tree planting, tree management, Channel narrowing '	70	government budget	-	yes	no	no
119	UK	Ober Water	4	2006	provincial/regional authorities,	works within channel, works within floodplain,	river reach lenght < 2 km	1	0.4	75000	75	Works contained the excavation and reinstatement of former meandering channel, installation of a clay plug 20-30cm higher than the surrounding floodplain and removal of weed from a 350m length of channel.	30	EU funding, government budget	-	yes	yes	yes
